# Supplementary material for: FOXP3+T Regulatory Cell Modifications in Inflammatory Bowel Disease Patients Treated with Anti-TNFαAgents
Source: Hindawi journal article supplement (doi:10.1155/2013/286368), 2013-01-01
Supplement: f1 [file 286368.f1.pdf]

**Table IS. Peripheral blood (PB) CD4<sup>+</sup>CD25<sup>+</sup>FOXP3<sup>+</sup> levels (TNF: Tumor Necrosis Factor, IBD: Inflammatory Bowel Disease).**

| <b>Subjects (n)</b>         | <b>Mean PB Tregs<br/>before anti-TNF<math>\alpha</math><br/>(T0)</b> | <b>SD<sup>^</sup></b> | <b>Mean PB Tregs<br/>after anti-TNF<math>\alpha</math><br/>(T1)</b> | <b>SD<sup>^</sup></b> | <b>P values<br/>T0 vs T1*</b> | <b>P values<br/>T0 vs controls #</b> | <b>P values<br/>T1 vs<br/>controls #</b> |
|-----------------------------|----------------------------------------------------------------------|-----------------------|---------------------------------------------------------------------|-----------------------|-------------------------------|--------------------------------------|------------------------------------------|
| All IBD (32)                | 3.05                                                                 | 2.29                  | 6.52                                                                | 4                     | 0.0009                        | 0.13                                 | 0.0001                                   |
| Crohn's Disease (25)        | 3.86                                                                 | 2.25                  | 6.75                                                                | 4.33                  | 0.0081                        | 0.093                                | 0.0003                                   |
| Ulcerative Colitis (7)      | 3.10                                                                 | 2.5                   | 5.71                                                                | 2.6                   | 0.13                          | 0.94                                 | 0.0326                                   |
| Clinical responders (26)    | 3.69                                                                 | 2.33                  | 7.14                                                                | 4.07                  | 0.0006                        | 0.2                                  | 0.0001                                   |
| CD responders (21)          | 4.02                                                                 | 2.31                  | 7.31                                                                | 4.39                  | 0.0045                        | 0.08                                 | 0.0003                                   |
| UC responders (5)           | 2.31                                                                 | 2.06                  | 6.43                                                                | 2.5                   | 0.064                         | 0.48                                 | 0.04                                     |
| Clinical non responders (6) | 3.85                                                                 | 2.31                  | 3.85                                                                | 2.47                  | 0.99                          | 0.43                                 | 0.46                                     |
| Controls (8)                | 3.03                                                                 | 0.58                  |                                                                     |                       |                               |                                      |                                          |

<sup>^</sup>Standard Deviation

\*by t test for paired samples

# by t test for independent samples

LEGEND FOR SUPPLEMENTARY FIGURE:

**Figure 1S.** Treg frequencies in peripheral blood (PB) of IBD clinical responders (n= 26) before and after anti-TNF $\alpha$  therapy; p value by t test for paired samples.

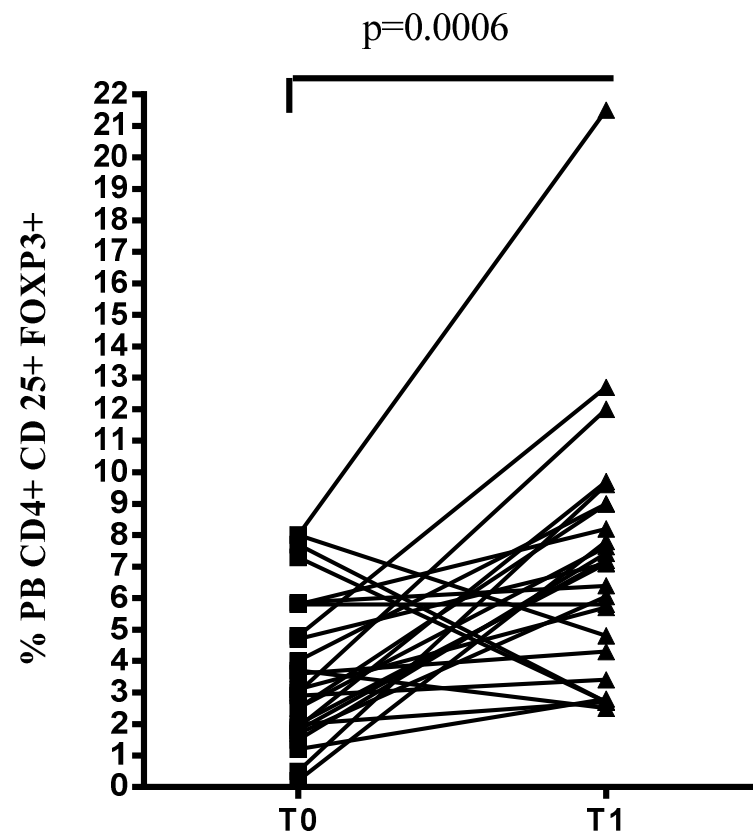

Figure 1S
